# Supplementary material for: Discovery of novel phosphors for use in light emitting diodes using heuristics optimization-assisted combinatorial chemistry
Source: Royal Society of Chemistry journal article supplement (doi:10.1039/c2jm30280b), 2012-01-01
Supplement: c2jm30280b.pdf [file c2jm30280b.pdf]

# 1<sup>st</sup> Generation

## Table s1

|    | LiO1/2 | KO1/2  | NaO1/2 | Mgo    | SrO    | CaO    | BaO    | ZnO    | PO5/2  | EuO3/2 | $\lambda_{ex}=254nm$ | $\lambda_{ex}=390nm$ |
|----|--------|--------|--------|--------|--------|--------|--------|--------|--------|--------|----------------------|----------------------|
| 1  |        | 0.4400 |        |        |        |        |        | 0.2786 | 0.2800 | 0.0014 | 17148                | 4091                 |
| 2  |        |        | 0.1000 |        |        |        |        | 0.1990 | 0.7000 | 0.0010 | 14712                | 8373                 |
| 3  |        |        | 0.0625 |        |        |        |        | 0.2375 | 0.6875 | 0.0119 | 17452                | 7455                 |
| 4  |        | 0.1875 |        |        |        | 0.4975 |        |        | 0.3125 | 0.0025 | 41819                | 78390                |
| 5  |        | 0.6875 |        |        |        |        | 0.2475 |        | 0.0625 | 0.0025 | 44020                | 2967                 |
| 6  |        | 0.0909 |        |        |        |        | 0.4455 |        | 0.4545 | 0.0089 | 82001                | 2573                 |
| 7  | 0.1667 |        |        |        | 0.4125 |        |        |        | 0.4167 | 0.0041 | 425999               | 299795               |
| 8  |        |        | 0.3571 |        |        |        |        | 0.3554 | 0.2857 | 0.0018 | 16634                | 5574                 |
| 9  |        |        | 0.0667 |        | 0.1990 |        |        |        | 0.7333 | 0.0010 | 229385               | 136060               |
| 10 |        |        | 0.6875 |        |        |        | 0.1188 |        | 0.1875 | 0.0059 | 149153               | 1066                 |
| 11 |        | 0.1333 |        |        |        | 0.4573 |        |        | 0.4000 | 0.0091 | 28673                | 60010                |
| 12 |        |        | 0.2222 |        |        |        |        | 0.2111 | 0.5556 | 0.0106 | 17518                | 7282                 |
| 13 | 0.4783 |        |        |        |        | 0.2065 |        |        | 0.3043 | 0.0103 | 22361                | 4382                 |
| 14 |        |        | 0.4286 |        |        |        |        | 0.2262 | 0.3333 | 0.0113 | 12537                | 4418                 |
| 15 | 0.3600 |        |        |        |        |        | 0.1900 |        | 0.4400 | 0.0095 | 100917               | 129952               |
| 16 | 0.2500 |        |        |        |        |        | 0.1658 |        | 0.5833 | 0.0008 | 83890                | 101044               |
| 17 | 0.2400 |        |        |        |        |        | 0.3582 |        | 0.4000 | 0.0018 | 319865               | 400240               |
| 18 |        | 0.3600 |        |        | 0.1960 |        |        |        | 0.4400 | 0.0039 | 167080               | 344270               |
| 19 | 0.0625 |        |        |        |        |        |        | 0.6219 | 0.3125 | 0.0031 | 22872                | 626                  |
| 20 |        |        | 0.1875 | 0.4750 |        |        |        |        | 0.3125 | 0.0238 | 85443                | 79662                |
| 21 | 0.4000 |        |        | 0.2786 |        |        |        |        | 0.3200 | 0.0014 | 41151                | 5503                 |
| 22 |        | 0.0714 |        |        | 0.1400 |        |        |        | 0.7857 | 0.0028 | 10291                | 4971                 |
| 23 |        |        | 0.3750 |        |        |        |        | 0.1650 | 0.4583 | 0.0017 | 22636                | 7205                 |
| 24 | 0.3182 |        |        |        | 0.1800 |        |        |        | 0.5000 | 0.0018 | 14792                | 7565                 |
| 25 | 0.1818 |        |        |        | 0.0864 |        |        |        | 0.7273 | 0.0043 | 14464                | 7611                 |
| 26 | 0.3125 |        |        |        |        |        | 0.6219 |        | 0.0625 | 0.0031 | 86711                | 147498               |
| 27 |        |        | 0.5333 |        |        |        |        | 0.3317 | 0.1333 | 0.0017 | 30878                | 3127                 |
| 28 |        | 0.1111 |        |        |        | 0.4222 |        |        | 0.4444 | 0.0211 | 16841                | 36717                |
| 29 |        | 0.6364 |        |        | 0.2673 |        |        |        | 0.0909 | 0.0053 | 104076               | 109692               |
| 30 |        | 0.4000 |        |        | 0.2744 |        |        |        | 0.3200 | 0.0055 | 375627               | 34881                |
| 31 | 0.1000 |        |        |        |        | 0.1900 |        |        | 0.7000 | 0.0095 | 13472                | 7345                 |
| 32 | 0.5000 |        |        |        |        | 0.3455 |        |        | 0.1364 | 0.0173 | 5188                 | 1227                 |
| 33 |        | 0.2143 |        |        |        |        | 0.7071 |        | 0.0714 | 0.0071 | 23061                | 78363                |
| 34 |        | 0.4000 |        |        | 0.1960 |        |        |        | 0.4000 | 0.0039 | 451781               | 427329               |
| 35 |        | 0.2857 |        |        |        |        | 0.3300 |        | 0.3810 | 0.0033 | 732909               | 283056               |
| 36 |        | 0.1875 |        |        |        | 0.4750 |        |        | 0.3125 | 0.0238 | 20115                | 40771                |

## 2nd Generation

# Table s1

|    | LiO1/2 | KO1/2  | NaO1/2 | Mgo    | SrO    | CaO    | BaO    | ZnO    | PO5/2  | EuO3/2 | $\lambda_{ex}=254nm$ | $\lambda_{ex}=390nm$ |
|----|--------|--------|--------|--------|--------|--------|--------|--------|--------|--------|----------------------|----------------------|
| 1  |        | 0.1333 |        |        | 0.1960 |        |        |        | 0.6667 | 0.0039 | 37746                | 7685                 |
| 2  | 0.2632 |        |        |        |        | 0.2500 |        |        | 0.4737 | 0.0125 | 9959                 | 2205                 |
| 3  | 0.3333 |        |        |        | 0.2357 |        |        |        | 0.4286 | 0.0024 | 120191               | 84083                |
| 4  |        | 0.0667 |        |        | 0.4573 |        |        |        | 0.4667 | 0.0091 | 593287               | 565709               |
| 5  | 0.4545 |        |        |        |        | 0.4455 |        |        | 0.0909 | 0.0089 | 68555                | 3052                 |
| 6  |        | 0.0667 |        |        | 0.1960 |        |        |        | 0.7333 | 0.0039 | 45916                | 10650                |
| 7  |        |        | 0.5000 |        |        |        |        | 0.1244 | 0.3750 | 0.0006 | 14596                | 5755                 |
| 8  |        | 0.2500 |        |        | 0.4083 |        |        |        | 0.3333 | 0.0082 | 901341               | 794522               |
| 9  | 0.1429 |        |        |        |        |        | 0.2714 |        | 0.5714 | 0.0136 | 6173                 | 487                  |
| 10 |        |        | 0.0833 |        |        |        |        | 0.3300 | 0.5833 | 0.0033 | 6946                 | 2403                 |
| 11 |        | 0.0952 |        |        | 0.4200 |        |        |        | 0.4762 | 0.0084 | 761748               | 647923               |
| 12 |        | 0.4762 |        |        |        |        | 0.1414 |        | 0.3810 | 0.0014 | 210987               | 51735                |
| 13 | 0.2667 |        |        |        |        |        | 0.4433 |        | 0.2667 | 0.0222 | 41592                | 2848                 |
| 14 |        | 0.3043 |        |        | 0.2130 |        |        |        | 0.4783 | 0.0043 | 504897               | 365562               |
| 15 |        | 0.2857 |        |        | 0.3267 |        |        |        | 0.3810 | 0.0065 | 241694               | 293819               |
| 16 |        | 0.4000 |        |        |        |        | 0.1980 |        | 0.4000 | 0.0020 | 187699               | 36584                |
| 17 |        | 0.5000 |        |        |        |        | 0.1244 |        | 0.3750 | 0.0006 | 229609               | 42932                |
| 18 |        | 0.5000 |        |        | 0.1244 |        |        |        | 0.3750 | 0.0006 | 193035               | 52587                |
| 19 |        |        | 0.3043 |        |        |        |        | 0.3893 | 0.3043 | 0.0019 | 8587                 | 1617                 |
| 20 |        | 0.5294 |        | 0.1676 |        |        |        |        | 0.2941 | 0.0084 | 18752                | 4408                 |
| 21 |        | 0.1250 |        |        |        | 0.3958 |        |        | 0.4583 | 0.0198 | 11220                | 3319                 |
| 22 | 0.1429 |        |        |        |        |        | 0.4264 |        | 0.4286 | 0.0021 | 359025               | 6858                 |
| 23 | 0.1667 |        |        |        |        |        | 0.3958 |        | 0.4167 | 0.0198 | 45953                | 271335               |
| 24 | 0.3600 |        |        |        | 0.1980 |        |        |        | 0.4400 | 0.0020 | 165120               | 103860               |
| 25 |        | 0.6875 |        |        |        | 0.2488 |        |        | 0.0625 | 0.0012 | 51617                | 7516                 |
| 26 |        | 0.1875 |        |        |        |        | 0.4950 |        | 0.3125 | 0.0050 | 19682                | 2978                 |
| 27 |        | 0.1538 |        |        |        | 0.2262 |        |        | 0.6154 | 0.0045 | 11311                | 4614                 |
| 28 | 0.0909 |        |        |        |        | 0.6332 |        |        | 0.2727 | 0.0032 | 30432                | 9390                 |
| 29 | 0.1667 |        |        |        | 0.3958 |        |        |        | 0.4167 | 0.0198 | 338145               | 435043               |
| 30 | 0.1818 |        |        |        | 0.0900 |        |        |        | 0.7273 | 0.0009 | 0                    | 0                    |
| 31 |        |        | 0.1000 | 0.1900 |        |        |        |        | 0.7000 | 0.0095 | 7903                 | 713                  |
| 32 | 0.1875 |        |        |        |        | 0.4750 |        |        | 0.3125 | 0.0238 | 16772                | 2637                 |
| 33 |        |        | 0.1875 |        |        |        |        | 0.4750 | 0.3125 | 0.0238 | 76268                | 9171                 |
| 34 |        | 0.4286 |        |        |        | 0.2369 |        |        | 0.3333 | 0.0012 | 27021                | 8884                 |
| 35 |        | 0.2857 |        |        |        |        | 0.3300 |        | 0.3810 | 0.0033 | 798184               | 376743               |
| 36 |        | 0.4000 |        |        | 0.1960 |        |        |        | 0.4000 | 0.0039 | 596351               | 564074               |

### 3rd Generation

# Table s1

|    | LiO1/2 | KO1/2  | NaO1/2 | Mgo    | SrO    | CaO    | BaO    | ZnO    | PO5/2  | EuO3/2 | $\lambda_{ex}=254nm$ | $\lambda_{ex}=390nm$ |
|----|--------|--------|--------|--------|--------|--------|--------|--------|--------|--------|----------------------|----------------------|
| 1  |        |        | 0.2667 |        |        |        | 0.3317 |        | 0.4000 | 0.0017 | 900407               | 323003               |
| 2  |        | 0.0625 |        |        |        |        |        | 0.3713 | 0.5625 | 0.0037 | 7177                 | 1567                 |
| 3  |        | 0.4286 |        |        |        |        | 0.2369 |        | 0.3333 | 0.0012 | 1101510              | 491405               |
| 4  |        | 0.5000 |        |        |        | 0.1244 |        |        | 0.3750 | 0.0006 | 34902                | 3870                 |
| 5  |        | 0.1875 |        |        | 0.4750 |        |        |        | 0.3125 | 0.0238 | 97278                | 103746               |
| 6  |        | 0.1250 |        |        | 0.3958 |        |        |        | 0.4583 | 0.0198 | 480080               | 526537               |
| 7  |        | 0.0952 |        |        | 0.4264 |        |        |        | 0.4762 | 0.0021 | 869787               | 604373               |
| 8  |        |        | 0.3043 |        |        |        |        | 0.3835 | 0.3043 | 0.0077 | 16885                | 2519                 |
| 9  |        |        | 0.1333 |        |        |        |        | 0.1990 | 0.6667 | 0.0010 | 11373                | 3622                 |
| 10 |        | 0.3043 |        |        | 0.3835 |        |        |        | 0.3043 | 0.0077 | 255203               | 188432               |
| 11 |        | 0.0667 |        |        | 0.4433 |        |        |        | 0.4667 | 0.0222 | 453292               | 523080               |
| 12 | 0.1667 |        |        |        | 0.4083 |        |        |        | 0.4167 | 0.0082 | 439845               | 408586               |
| 13 |        | 0.0667 |        |        | 0.1960 |        |        |        | 0.7333 | 0.0039 | 62623                | 12513                |
| 14 |        | 0.0667 |        |        | 0.4573 |        |        |        | 0.4667 | 0.0091 | 710532               | 687639               |
| 15 |        | 0.5000 |        |        | 0.2475 |        |        |        | 0.2500 | 0.0025 | 1004390              | 561659               |
| 16 |        | 0.3600 |        |        |        | 0.1990 |        |        | 0.4400 | 0.0010 | 80441                | 6949                 |
| 17 |        | 0.0952 |        |        |        | 0.4071 |        |        | 0.4762 | 0.0204 | 14536                | 2351                 |
| 18 |        | 0.2400 |        |        |        |        | 0.3564 |        | 0.4000 | 0.0036 | 466656               | 188741               |
| 19 |        | 0.2143 |        |        | 0.1400 |        |        |        | 0.6429 | 0.0028 | 0                    | 0                    |
| 20 |        | 0.1923 |        |        | 0.3769 |        |        |        | 0.4231 | 0.0075 | 60831                | 20101                |
| 21 |        |        | 0.0667 |        |        |        |        | 0.4433 | 0.4667 | 0.0222 | 22223                | 888                  |
| 22 |        | 0.1875 |        |        | 0.4900 |        |        |        | 0.3125 | 0.0098 | 84674                | 40894                |
| 23 |        | 0.4000 |        |        | 0.3528 |        |        |        | 0.2400 | 0.0071 | 250925               | 135801               |
| 24 |        |        | 0.1875 | 0.2488 |        |        |        |        | 0.5625 | 0.0012 | 30246                | 3844                 |
| 25 |        | 0.1429 |        |        |        | 0.2800 |        |        | 0.5714 | 0.0056 | 8522                 | 3471                 |
| 26 |        |        | 0.4000 |        | 0.1900 |        |        |        | 0.4000 | 0.0095 | 50450                | 38849                |
| 27 | 0.1538 |        |        |        |        |        | 0.2192 |        | 0.6154 | 0.0110 | 1471                 | 55                   |
| 28 |        | 0.2667 |        |        |        | 0.4573 |        |        | 0.2667 | 0.0091 | 862783               | 1255790              |
| 29 |        | 0.4000 |        |        | 0.1960 |        |        |        | 0.4000 | 0.0039 | 320447               | 128201               |
| 30 |        | 0.0952 |        |        | 0.4200 |        |        |        | 0.4762 | 0.0084 | 927817               | 766664               |
| 31 |        | 0.0833 |        |        |        | 0.3267 |        |        | 0.5833 | 0.0065 | 0                    | 0                    |
| 32 |        |        | 0.1538 |        |        |        |        | 0.2285 | 0.6154 | 0.0023 | 16091                | 5874                 |
| 33 | 0.4000 |        |        |        |        |        | 0.4750 |        | 0.1000 | 0.0238 | 52518                | 3157                 |
| 34 |        | 0.4500 |        |        |        |        |        | 0.1980 | 0.3500 | 0.0020 | 25420                | 4770                 |
| 35 |        | 0.3571 |        |        | 0.3554 |        |        |        | 0.2857 | 0.0018 | 392632               | 173181               |
| 36 |        | 0.2500 |        |        | 0.4083 |        |        |        | 0.3333 | 0.0082 | 932014               | 675889               |

## 4th Generation

# Table s1

|    | LiO1/2 | KO1/2  | NaO1/2 | Mgo    | SrO    | CaO    | BaO    | ZnO    | PO5/2  | EuO3/2 | $\lambda_{ex}=254nm$ | $\lambda_{ex}=390nm$ |
|----|--------|--------|--------|--------|--------|--------|--------|--------|--------|--------|----------------------|----------------------|
| 1  |        | 0.3333 |        |        |        |        | 0.2369 |        | 0.4286 | 0.0012 | 264091               | 19589                |
| 2  |        |        | 0.3333 |        | 0.4083 |        |        |        | 0.2500 | 0.0082 | 10635                | 2357                 |
| 3  |        | 0.0556 |        |        | 0.5278 |        |        |        | 0.3889 | 0.0264 | 337462               | 321393               |
| 4  |        | 0.2308 |        |        |        | 0.3769 |        |        | 0.3846 | 0.0075 | 28796                | 18328                |
| 5  |        | 0.1333 |        |        | 0.1960 |        |        |        | 0.6667 | 0.0039 | 119920               | 162426               |
| 6  |        |        | 0.0667 |        |        |        |        | 0.4643 | 0.4667 | 0.0023 | 9501                 | 8357                 |
| 7  |        | 0.3889 |        |        | 0.3167 |        |        |        | 0.2778 | 0.0158 | 175016               | 375307               |
| 8  |        | 0.2800 |        |        | 0.3528 |        |        |        | 0.3600 | 0.0071 | 38720                | 379561               |
| 9  | 0.3077 |        |        |        | 0.3769 |        |        |        | 0.3077 | 0.0075 | 18935                | 10430                |
| 10 |        |        | 0.6364 |        | 0.0891 |        |        |        | 0.2727 | 0.0018 | 14011                | 15845                |
| 11 |        | 0.2667 |        |        |        |        | 0.3300 |        | 0.4000 | 0.0033 | 758229               | 416615               |
| 12 |        |        | 0.2400 |        |        |        | 0.3582 |        | 0.4000 | 0.0018 | 1056340              | 432146               |
| 13 | 0.1579 |        |        |        | 0.2579 |        |        |        | 0.5789 | 0.0052 | 54285                | 102932               |
| 14 |        |        | 0.1765 | 0.4097 |        |        |        |        | 0.4118 | 0.0020 | 101475               | 100476               |
| 15 |        | 0.0952 |        |        |        | 0.4200 |        |        | 0.4762 | 0.0084 | 13671                | 18183                |
| 16 |        | 0.1875 |        |        | 0.4750 |        |        |        | 0.3125 | 0.0238 | 15849                | 23885                |
| 17 |        | 0.2000 |        |        |        | 0.3167 |        |        | 0.4667 | 0.0158 | 11962                | 7483                 |
| 18 |        | 0.3636 |        |        |        |        |        | 0.2700 | 0.3636 | 0.0027 | 17013                | 13941                |
| 19 |        | 0.0625 |        |        |        |        | 0.3713 |        | 0.5625 | 0.0037 | 8999                 | 5674                 |
| 20 | 0.0667 |        |        |        | 0.1990 |        |        |        | 0.7333 | 0.0010 | 8220                 | 21025                |
| 21 |        | 0.4583 |        |        | 0.1658 |        |        |        | 0.3750 | 0.0008 | 166265               | 114368               |
| 22 | 0.2500 |        |        |        |        |        |        | 0.2940 | 0.4500 | 0.0059 | 10111                | 22670                |
| 23 |        | 0.3043 |        |        | 0.3835 |        |        |        | 0.3043 | 0.0077 | 22558                | 23826                |
| 24 |        |        | 0.1875 |        |        |        |        | 0.4900 | 0.3125 | 0.0098 | 8973                 | 11284                |
| 25 |        | 0.1429 |        |        |        | 0.5429 |        |        | 0.2857 | 0.0271 | 21907                | 54286                |
| 26 |        | 0.3000 |        |        | 0.2850 |        |        |        | 0.4000 | 0.0143 | 14857                | 23137                |
| 27 |        | 0.2400 |        |        |        |        | 0.3582 |        | 0.4000 | 0.0018 | 516368               | 170974               |
| 28 |        |        | 0.3636 |        | 0.0900 |        |        |        | 0.5455 | 0.0009 | 60469                | 100246               |
| 29 |        | 0.4000 |        |        | 0.2660 |        |        |        | 0.3200 | 0.0133 | 14028                | 14266                |
| 30 |        | 0.3000 |        |        | 0.3167 |        |        |        | 0.3667 | 0.0158 | 252863               | 241788               |
| 31 |        | 0.2500 |        |        | 0.3500 |        |        |        | 0.3929 | 0.0070 | 32342                | 266750               |
| 32 |        | 0.3500 |        |        | 0.2940 |        |        |        | 0.3500 | 0.0059 | 363508               | 399240               |
| 33 | 0.0625 |        |        |        | 0.3675 |        |        |        | 0.5625 | 0.0074 | 294210               | 225274               |
| 34 |        | 0.1667 |        |        |        |        |        | 0.4125 | 0.4167 | 0.0041 | 13757                | 17845                |
| 35 |        | 0.4286 |        |        |        |        | 0.2369 |        | 0.3333 | 0.0012 | 1055190              | 430689               |
| 36 |        | 0.2667 |        |        |        | 0.4573 |        |        | 0.2667 | 0.0091 | 910890               | 1308380              |

## 5th Generation

# Table s1

|    | LiO1/2 | KO1/2  | NaO1/2 | Mgo    | SrO    | CaO    | BaO    | ZnO    | PO5/2  | EuO3/2 | $\lambda_{ex}=254nm$ | $\lambda_{ex}=390nm$ |
|----|--------|--------|--------|--------|--------|--------|--------|--------|--------|--------|----------------------|----------------------|
| 1  |        | 0.3000 |        |        | 0.2940 |        |        |        | 0.4000 | 0.0059 | 205793               | 268984               |
| 2  |        |        | 0.5455 |        | 0.2700 |        |        |        | 0.1818 | 0.0027 | 294212               | 8773                 |
| 3  |        | 0.1250 |        |        |        |        | 0.4146 |        | 0.4583 | 0.0021 | 129061               | 9247                 |
| 4  |        | 0.2381 |        |        |        |        | 0.3317 |        | 0.4286 | 0.0017 | 361203               | 165718               |
| 5  |        |        | 0.1765 |        | 0.4035 |        |        |        | 0.4118 | 0.0081 | 236763               | 320700               |
| 6  |        |        | 0.3333 | 0.4146 |        |        |        |        | 0.2500 | 0.0021 | 168837               | 11909                |
| 7  |        | 0.0714 |        |        |        | 0.4200 |        |        | 0.5000 | 0.0084 | 7058                 | 4679                 |
| 8  |        | 0.2632 |        |        |        |        | 0.4689 |        | 0.2632 | 0.0047 | 287273               | 197839               |
| 9  |        |        | 0.3636 |        | 0.0905 |        |        |        | 0.5455 | 0.0005 | 122608               | 71156                |
| 10 |        |        | 0.2400 |        |        |        | 0.3564 |        | 0.4000 | 0.0036 | 973406               | 494062               |
| 11 |        | 0.3889 |        |        | 0.3267 |        |        |        | 0.2778 | 0.0065 | 647338               | 629699               |
| 12 |        | 0.2800 |        |        | 0.3420 |        |        |        | 0.3600 | 0.0171 | 460369               | 514836               |
| 13 | 0.1579 |        |        |        | 0.2579 |        |        |        | 0.5789 | 0.0052 | 225059               | 270145               |
| 14 |        | 0.3846 |        |        |        |        | 0.5331 |        | 0.0769 | 0.0053 | 121                  | 117                  |
| 15 | 0.3478 |        |        |        |        |        | 0.3874 |        | 0.2609 | 0.0039 | 495654               | 226097               |
| 16 | 0.0952 |        |        |        | 0.4200 |        |        |        | 0.4762 | 0.0084 | 1124610              | 1088840              |
| 17 |        | 0.2400 |        |        |        |        | 0.3528 |        | 0.4000 | 0.0071 | 495432               | 224350               |
| 18 |        | 0.0952 |        |        |        | 0.4264 |        |        | 0.4762 | 0.0021 | 23130                | 174868               |
| 19 |        | 0.3913 |        | 0.2130 |        |        |        |        | 0.3913 | 0.0043 | 34423                | 2399                 |
| 20 |        |        | 0.2381 |        |        |        | 0.3317 |        | 0.4286 | 0.0017 | 727872               | 340732               |
| 21 |        | 0.3636 |        |        | 0.2673 |        |        |        | 0.3636 | 0.0053 | 403172               | 377589               |
| 22 |        | 0.2800 |        |        |        |        |        | 0.3564 | 0.3600 | 0.0036 | 7929                 | 2503                 |
| 23 |        | 0.2778 |        |        |        | 0.4356 |        |        | 0.2778 | 0.0087 | 44827                | 6781                 |
| 24 | 0.3000 |        |        | 0.4900 |        |        |        |        | 0.2000 | 0.0098 | 225524               | 74901                |
| 25 | 0.2143 |        |        |        | 0.1400 |        |        |        | 0.6429 | 0.0028 | 52543                | 32686                |
| 26 | 0.4286 |        |        |        | 0.2333 |        |        |        | 0.3333 | 0.0047 | 147169               | 218376               |
| 27 |        |        | 0.2400 |        | 0.3564 |        |        |        | 0.4000 | 0.0036 | 388503               | 341413               |
| 28 |        | 0.3636 |        |        |        |        | 0.0905 |        | 0.5455 | 0.0005 | 9708                 | 9874                 |
| 29 |        |        | 0.1818 |        |        |        | 0.3618 |        | 0.4545 | 0.0018 | 15953                | 3141                 |
| 30 |        | 0.4583 |        |        |        |        | 0.2488 |        | 0.2917 | 0.0012 | 710654               | 266884               |
| 31 |        | 0.0556 |        |        | 0.5528 |        |        |        | 0.3889 | 0.0028 | 232813               | 7688                 |
| 32 |        | 0.4583 |        |        | 0.1583 |        |        |        | 0.3750 | 0.0079 | 15729                | 7668                 |
| 33 |        | 0.1579 |        |        |        |        | 0.2605 |        | 0.5789 | 0.0026 | 3100                 | 325                  |
| 34 | 0.2667 |        |        |        | 0.3267 |        |        |        | 0.4000 | 0.0065 | 42251                | 58014                |
| 35 |        |        | 0.2400 |        |        |        | 0.3582 |        | 0.4000 | 0.0018 | 890067               | 396439               |
| 36 |        | 0.2667 |        |        |        | 0.4573 |        |        | 0.2667 | 0.0091 | 698836               | 1113720              |

# 1<sup>st</sup> Swarm

## Table s2

|           | <b>k</b> | <b>Sr</b> | <b>Ba</b> | <b>Ca</b> | <b>P</b> | <b>Eu</b> | $\lambda_{ex}=400nm$ |
|-----------|----------|-----------|-----------|-----------|----------|-----------|----------------------|
| <b>1</b>  | 0.2864   | 0.0452    | 0.0750    | 0.0380    | 0.5522   | 0.0032    | <i>fail</i>          |
| <b>2</b>  | 0.3118   | 0.2006    | 0.0005    | 0.1121    | 0.3686   | 0.0064    | <b>2938</b>          |
| <b>3</b>  | 0.6658   | 0.0667    | 0.0540    | 0.0361    | 0.1743   | 0.0032    | <b>1966</b>          |
| <b>4</b>  | 0.3372   | 0.0568    | 0.0623    | 0.3491    | 0.1850   | 0.0096    | <b>2146</b>          |
| <b>5</b>  | 0.5650   | 0.0520    | 0.0498    | 0.1083    | 0.2206   | 0.0043    | <b>3880</b>          |
| <b>6</b>  | 0.2983   | 0.4156    | 0.0572    | 0.0694    | 0.1485   | 0.0111    | <i>fail</i>          |
| <b>7</b>  | 0.4380   | 0.0454    | 0.3075    | 0.0620    | 0.1386   | 0.0085    | <i>fail</i>          |
| <b>8</b>  | 0.2602   | 0.0142    | 0.1070    | 0.1884    | 0.4239   | 0.0063    | <i>fail</i>          |
| <b>9</b>  | 0.5777   | 0.2317    | 0.0086    | 0.0473    | 0.1288   | 0.0059    | <b>148</b>           |
| <b>10</b> | 0.3999   | 0.1492    | 0.0199    | 0.0133    | 0.4141   | 0.0037    | <i>fail</i>          |
| <b>11</b> | 0.3245   | 0.1169    | 0.0940    | 0.1799    | 0.2768   | 0.0080    | <b>7060</b>          |
| <b>12</b> | 0.5007   | 0.0696    | 0.0072    | 0.0521    | 0.3677   | 0.0026    | <i>fail</i>          |
| <b>13</b> | 0.2729   | 0.0617    | 0.1434    | 0.1820    | 0.3321   | 0.0079    | <b>8003</b>          |
| <b>14</b> | 0.5261   | 0.1458    | 0.0599    | 0.0784    | 0.1841   | 0.0058    | <b>2061</b>          |
| <b>15</b> | 0.2437   | 0.0071    | 0.0994    | 0.3398    | 0.3008   | 0.0091    | <b>11972</b>         |
| <b>16</b> | 0.5523   | 0.0731    | 0.0594    | 0.0001    | 0.3124   | 0.0027    | <i>fail</i>          |
| <b>17</b> | 0.2856   | 0.0210    | 0.3060    | 0.1377    | 0.2403   | 0.0095    | <b>5384</b>          |
| <b>18</b> | 0.3118   | 0.0897    | 0.0506    | 0.1730    | 0.3686   | 0.0064    | <i>fail</i>          |

## 2<sup>nd</sup> Swarm

# Table s2

|           | <b>k</b> | <b>Sr</b> | <b>Ba</b> | <b>Ca</b> | <b>P</b> | <b>Eu</b> | $\lambda_{\text{ex}}=400\text{nm}$ |
|-----------|----------|-----------|-----------|-----------|----------|-----------|------------------------------------|
| <b>1</b>  | 0.2460   | 0.0712    | 0.0000    | 0.2355    | 0.4410   | 0.0063    | <i>fail</i>                        |
| <b>2</b>  | 0.3098   | 0.0000    | 0.0863    | 0.2331    | 0.3644   | 0.0065    | <i>fail</i>                        |
| <b>3</b>  | 0.5073   | 0.0000    | 0.1366    | 0.1958    | 0.1534   | 0.0068    | <i>fail</i>                        |
| <b>4</b>  | 0.3306   | 0.0152    | 0.0727    | 0.2910    | 0.2827   | 0.0077    | <b>9953</b>                        |
| <b>5</b>  | 0.4313   | 0.0251    | 0.1146    | 0.2581    | 0.1628   | 0.0081    | <i>fail</i>                        |
| <b>6</b>  | 0.2376   | 0.0768    | 0.0864    | 0.3494    | 0.2393   | 0.0105    | <b>3489</b>                        |
| <b>7</b>  | 0.2309   | 0.0417    | 0.3047    | 0.0696    | 0.3446   | 0.0085    | <b>8062</b>                        |
| <b>8</b>  | 0.2412   | 0.0181    | 0.0398    | 0.3703    | 0.3219   | 0.0087    | <b>3508</b>                        |
| <b>9</b>  | 0.2945   | 0.3340    | 0.0000    | 0.0873    | 0.2756   | 0.0086    | <b>1717</b>                        |
| <b>10</b> | 0.2309   | 0.4230    | 0.0573    | 0.1432    | 0.1327   | 0.0127    | <b>20</b>                          |
| <b>11</b> | 0.3011   | 0.0981    | 0.1007    | 0.2058    | 0.2861   | 0.0083    | <b>8317</b>                        |
| <b>12</b> | 0.3375   | 0.0000    | 0.0671    | 0.2053    | 0.3845   | 0.0056    | <i>fail</i>                        |
| <b>13</b> | 0.2633   | 0.0000    | 0.1301    | 0.3275    | 0.2698   | 0.0093    | <i>fail</i>                        |
| <b>14</b> | 0.3353   | 0.0000    | 0.1259    | 0.2527    | 0.2783   | 0.0077    | <b>3144</b>                        |
| <b>15</b> | 0.2437   | 0.0071    | 0.0994    | 0.3398    | 0.3008   | 0.0091    | <b>12232</b>                       |
| <b>16</b> | 0.5194   | 0.0385    | 0.1425    | 0.1768    | 0.1155   | 0.0073    | <b>491</b>                         |
| <b>17</b> | 0.2516   | 0.0198    | 0.0000    | 0.4481    | 0.2710   | 0.0095    | <b>10869</b>                       |
| <b>18</b> | 0.2330   | 0.1016    | 0.0292    | 0.2739    | 0.3541   | 0.0083    | <b>5653</b>                        |

### 3<sup>rd</sup> Swarm

## Table s2

|           | <b>k</b> | <b>Sr</b> | <b>Ba</b> | <b>Ca</b> | <b>P</b> | <b>Eu</b> | $\lambda_{\text{ex}}=400\text{nm}$ |
|-----------|----------|-----------|-----------|-----------|----------|-----------|------------------------------------|
| <b>1</b>  | 0.2928   | 0.0084    | 0.3171    | 0.0391    | 0.3352   | 0.0074    | <b>6142</b>                        |
| <b>2</b>  | 0.2831   | 0.1958    | 0.0285    | 0.2039    | 0.2800   | 0.0087    | <b>4034</b>                        |
| <b>3</b>  | 0.6185   | 0.0305    | 0.0273    | 0.0703    | 0.2507   | 0.0026    | <b>fail</b>                        |
| <b>4</b>  | 0.2908   | 0.0042    | 0.0945    | 0.3352    | 0.2664   | 0.0089    | <b>fail</b>                        |
| <b>5</b>  | 0.4849   | 0.0108    | 0.0938    | 0.2087    | 0.1954   | 0.0064    | <b>2810</b>                        |
| <b>6</b>  | 0.2465   | 0.0000    | 0.1012    | 0.3346    | 0.3088   | 0.0089    | <b>11472</b>                       |
| <b>7</b>  | 0.2359   | 0.0000    | 0.1532    | 0.3162    | 0.2851   | 0.0096    | <b>fail</b>                        |
| <b>8</b>  | 0.2415   | 0.0000    | 0.0951    | 0.3350    | 0.3196   | 0.0088    | <b>14211</b>                       |
| <b>9</b>  | 0.2726   | 0.0000    | 0.1381    | 0.2942    | 0.2863   | 0.0088    | <b>5312</b>                        |
| <b>10</b> | 0.2600   | 0.0000    | 0.0461    | 0.0670    | 0.6245   | 0.0023    | <b>fail</b>                        |
| <b>11</b> | 0.2996   | 0.0000    | 0.1041    | 0.2976    | 0.2904   | 0.0082    | <b>5022</b>                        |
| <b>12</b> | 0.5742   | 0.0566    | 0.0324    | 0.0720    | 0.2616   | 0.0033    | <b>fail</b>                        |
| <b>13</b> | 0.2426   | 0.0413    | 0.1558    | 0.2323    | 0.3193   | 0.0088    | <b>9816</b>                        |
| <b>14</b> | 0.2309   | 0.0086    | 0.0693    | 0.4577    | 0.2226   | 0.0109    | <b>2828</b>                        |
| <b>15</b> | 0.2437   | 0.0071    | 0.0994    | 0.3398    | 0.3008   | 0.0091    | <b>12239</b>                       |
| <b>16</b> | 0.2309   | 0.0000    | 0.1214    | 0.2492    | 0.3909   | 0.0076    | <b>fail</b>                        |
| <b>17</b> | 0.2500   | 0.0031    | 0.0497    | 0.3903    | 0.2979   | 0.0090    | <b>8366</b>                        |
| <b>18</b> | 0.2426   | 0.0520    | 0.0624    | 0.3134    | 0.3209   | 0.0087    | <b>3536</b>                        |



## 4<sup>th</sup> Swarm

# Table s2

|           | <b>k</b> | <b>Sr</b> | <b>Ba</b> | <b>Ca</b> | <b>P</b> | <b>Eu</b> | $\lambda_{ex}=400nm$ |
|-----------|----------|-----------|-----------|-----------|----------|-----------|----------------------|
| <i>1</i>  | 0.2430   | 0.0070    | 0.0000    | 0.4154    | 0.3259   | 0.0086    | 8485                 |
| <i>2</i>  | 0.2309   | 0.1208    | 0.0538    | 0.2170    | 0.3696   | 0.0080    | 3640                 |
| <i>3</i>  | 0.2680   | 0.0807    | 0.0189    | 0.3201    | 0.3037   | 0.0086    | 7754                 |
| <i>4</i>  | 0.2541   | 0.0028    | 0.0799    | 0.3105    | 0.3447   | 0.0080    | 5893                 |
| <i>5</i>  | 0.4124   | 0.1312    | 0.0227    | 0.1735    | 0.2535   | 0.0067    | 3819                 |
| <i>6</i>  | 0.2457   | 0.0001    | 0.0920    | 0.3324    | 0.3211   | 0.0087    | 8769                 |
| <i>7</i>  | 0.2377   | 0.0712    | 0.3484    | 0.0123    | 0.3215   | 0.0088    | 5881                 |
| <i>8</i>  | 0.2415   | 0.0000    | 0.0951    | 0.3350    | 0.3196   | 0.0088    | 13369                |
| <i>9</i>  | 0.2560   | 0.0001    | 0.0977    | 0.3194    | 0.3184   | 0.0085    | 10802                |
| <i>10</i> | 0.2952   | 0.4643    | 0.0000    | 0.1133    | 0.1155   | 0.0118    | 35                   |
| <i>11</i> | 0.2783   | 0.0725    | 0.0712    | 0.2702    | 0.2994   | 0.0084    | 5543                 |
| <i>12</i> | 0.3165   | 0.1256    | 0.0000    | 0.2025    | 0.3488   | 0.0067    | 7707                 |
| <i>13</i> | 0.2621   | 0.0424    | 0.0679    | 0.3067    | 0.3125   | 0.0085    | 7570                 |
| <i>14</i> | 0.3536   | 0.0052    | 0.0919    | 0.3078    | 0.2332   | 0.0083    | 5315                 |
| <i>15</i> | 0.2432   | 0.0000    | 0.0949    | 0.3278    | 0.3256   | 0.0086    | 11948                |
| <i>16</i> | 0.4209   | 0.0908    | 0.1293    | 0.2343    | 0.1155   | 0.0093    | 78                   |
| <i>17</i> | 0.2482   | 0.0252    | 0.0535    | 0.3676    | 0.2964   | 0.0091    | 9958                 |
| <i>18</i> | 0.2387   | 0.0353    | 0.0638    | 0.2964    | 0.3577   | 0.0081    | 3677                 |

## 5<sup>th</sup> Swarm

# Table s2

|           | <b>k</b> | <b>Sr</b> | <b>Ba</b> | <b>Ca</b> | <b>P</b> | <b>Eu</b> | $\lambda_{ex}=400nm$ |
|-----------|----------|-----------|-----------|-----------|----------|-----------|----------------------|
| <i>1</i>  | 0.2414   | 0.0043    | 0.1389    | 0.2863    | 0.3203   | 0.0088    | <i>3935</i>          |
| <i>2</i>  | 0.2637   | 0.1190    | 0.0687    | 0.2611    | 0.2784   | 0.0092    | <i>2504</i>          |
| <i>3</i>  | 0.5571   | 0.0385    | 0.0597    | 0.0936    | 0.2472   | 0.0039    | <i>5285</i>          |
| <i>4</i>  | 0.3258   | 0.0190    | 0.0843    | 0.3234    | 0.2389   | 0.0087    | <i>6744</i>          |
| <i>5</i>  | 0.5992   | 0.0000    | 0.0630    | 0.1178    | 0.2164   | 0.0037    | <i>6151</i>          |
| <i>6</i>  | 0.2395   | 0.0000    | 0.1049    | 0.3420    | 0.3045   | 0.0091    | <i>9502</i>          |
| <i>7</i>  | 0.2309   | 0.0000    | 0.1841    | 0.1925    | 0.3848   | 0.0077    | <i>fail</i>          |
| <i>8</i>  | 0.2415   | 0.0000    | 0.0951    | 0.3350    | 0.3196   | 0.0088    | <i>14262</i>         |
| <i>9</i>  | 0.2516   | 0.0000    | 0.0965    | 0.3293    | 0.3139   | 0.0087    | <i>12938</i>         |
| <i>10</i> | 0.4177   | 0.0000    | 0.0431    | 0.0700    | 0.4668   | 0.0023    | <i>fail</i>          |
| <i>11</i> | 0.3194   | 0.0000    | 0.1314    | 0.2618    | 0.2793   | 0.0080    | <i>1763</i>          |
| <i>12</i> | 0.2909   | 0.0000    | 0.0767    | 0.2876    | 0.3374   | 0.0074    | <i>5248</i>          |
| <i>13</i> | 0.2602   | 0.0000    | 0.1823    | 0.2264    | 0.3228   | 0.0083    | <i>10323</i>         |
| <i>14</i> | 0.3108   | 0.0000    | 0.0965    | 0.3270    | 0.2570   | 0.0086    | <i>7704</i>          |
| <i>15</i> | 0.2429   | 0.0080    | 0.0933    | 0.3285    | 0.3184   | 0.0088    | <i>13537</i>         |
| <i>16</i> | 0.3890   | 0.0000    | 0.1233    | 0.2783    | 0.2012   | 0.0082    | <i>7393</i>          |
| <i>17</i> | 0.2427   | 0.0071    | 0.0939    | 0.3752    | 0.2714   | 0.0097    | <i>4368</i>          |
| <i>18</i> | 0.2188   | 0.0045    | 0.1072    | 0.3622    | 0.2977   | 0.0097    | <i>18534</i>         |
